# Supplementary material for: Exploring the potential role of microbiota and metabolites in acute exacerbation of chronic obstructive pulmonary disease
Source: Frontiers journal article supplement (doi:10.3389/fmicb.2024.1487393), 2024-10-16
Supplement: Table_2.pdf [file Table_2.pdf]

Table S2 Modified Medical Research Council dyspnea scale, mMRC

| mMRC evaluation level | Severity                                                                                                                                  |
|-----------------------|-------------------------------------------------------------------------------------------------------------------------------------------|
| Level 0               | Difficulty breathing only occurs during intense physical activity                                                                         |
| Level 1               | Shortness of breath when walking briskly on flat ground or climbing small slopes on foot                                                  |
| Level 2               | Due to shortness of breath, walking on flat ground is slower than peers or requires stopping to rest                                      |
| Level 3               | After walking on flat ground for about 100 m or a few minutes, you need to stop and catch your breath                                     |
| Level 4               | Due to severe breathing difficulties, unable to leave home, or experiencing breathing difficulties while putting on or taking off clothes |
